# Supplementary material for: Novel VO2(M)–ZnO heterostructured dandelions with combined thermochromic and photocatalytic properties for application in smart coatings
Source: Royal Society of Chemistry journal article supplement (doi:10.1039/c5nj02875b), 2016-01-01
Supplement: c5nj02875b1.pdf [file c5nj02875b1.pdf]

*New Journal of Chemistry*

Electronic Supplementary Information

# Novel VO<sub>2</sub>(M)-ZnO heterostructured dandelions combined thermochromic and photocatalytic properties for application in smart coatings

Wenjing Li <sup>a,b</sup>, Shidong Ji <sup>a,\*</sup>, Guangyao Sun <sup>a,b</sup>, Yining Ma <sup>a,b</sup>, Hehe Guo <sup>a,b</sup>, and Ping Jin <sup>a,c,\*</sup>

<sup>a</sup> State Key Laboratory of High Performance Ceramics and Superfine Microstructure, Shanghai Institute of Ceramics, Chinese Academy of Sciences, Shanghai 200050, China

<sup>b</sup> Graduate University of Chinese Academy of Sciences, Beijing 100049, China

<sup>c</sup> National Institute of Advanced Industrial Science and Technology (AIST), MoriYama, Nagoya 463-8560, Japan

\* Author for correspondence. Email: p-jin@mail.sic.ac.cn, scki@mail.sic.ac.cn.

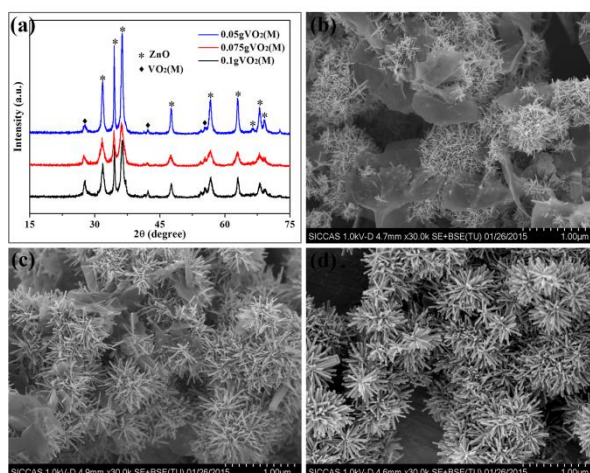

**Fig. S1.** (a) XRD patterns of the products with different amount of VO<sub>2</sub>(M) NPs, (b-d) the corresponding SEM images of the sample with 0.1, 0.075 and 0.05g VO<sub>2</sub>(M) NPs.

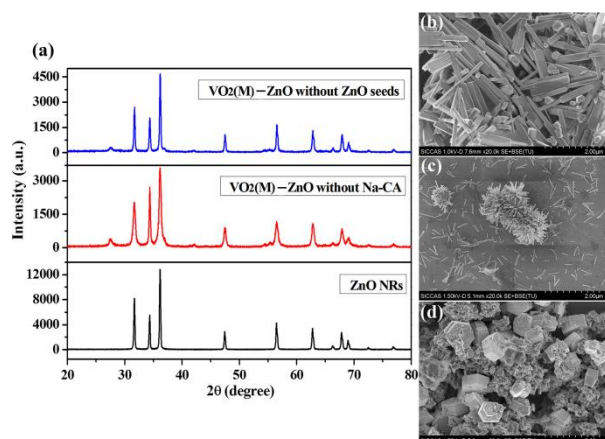

**Fig. S2.** (a) XRD patterns and (b-d) SEM images of the ZnO NRs, VO<sub>2</sub>(M)-ZnO without Na-CA, VO<sub>2</sub>(M)-ZnO without ZnO seeds.

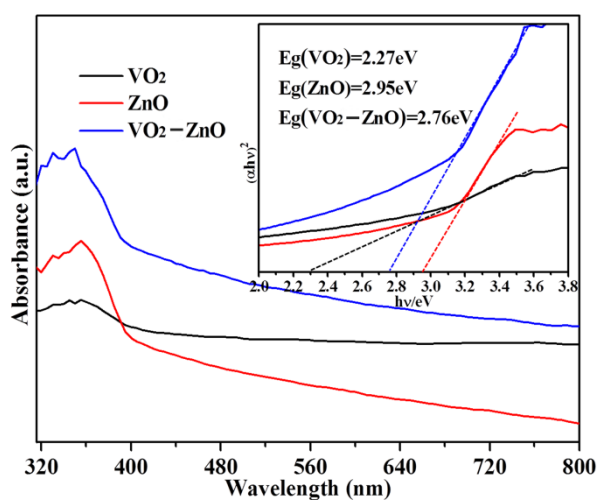

**Fig. S3.** UV-vis absorption spectra and the insert was the  $(\alpha h\nu)^2-h\nu$  relationship of the VO<sub>2</sub> NPs, ZnO NRs and VO<sub>2</sub>(M)-ZnO dandelions.
